# Supplementary material for: A battery-less and wireless wearable sensor system for identifying bed and chair exits in a pilot trial in hospitalized older people
Source: PubMed Central journal article supplement (PMC5633180; doi:10.1371/journal.pone.0185670), 2017-10-09
Supplement: pone.0185670.s001.pdf [file pone.0185670.s001.pdf]

## 1 Pseudo code

---

**Algorithm 1** Activity class assignment

---

**Require:** Output from classifier (probability for each class)  $Pr_k$ , Number of non-overlapping windows  $M$

- 1: **for**  $m=1$  to  $M$  ( $M$  can be  $\infty$ ) **do**
  - 2:      $y_{tmp} \leftarrow \sum_q (Pr_{k,q}); q \leftarrow (m-1) \times \mathcal{T}$  to  $m \times \mathcal{T}$ .
  - 3:      $y_{pred,m} \leftarrow \text{index of } \max_k(y_{tmp})$
-

---

**Algorithm 2** Bed and chair exit recognition from assigned classes

---

**Require:** predicted output  $y_{pred}$

```

1: for n=2 to N (N can be  $\infty$ ) do
2:   if  $y_{pred}(n-1) = \text{Sit\_on\_bed}$  then
3:     if  $y_{pred}(n) = \text{Sit\_on\_chair}$  then
4:       else if  $y_{pred}(n) = \text{Lying}$  then
5:         else if  $y_{pred}(n) = \text{Ambulating}$  then
6:       else if  $y_{pred}(n-1) = \text{Sit\_on\_chair}$  then
7:         if  $y_{pred}(n) = \text{Sit\_on\_bed}$  then
8:           if previous predicted bed/chair exit occurred more than 1.75 s ago then
9:              $\text{BedChairExitPred}(n) \leftarrow 1$ 
10:        else if  $y_{pred}(n) = \text{Lying}$  then
11:          if previous predicted bed/chair exit occurred more than 1.75 s ago then
12:             $\text{BedChairExitPred}(n) \leftarrow 1$ 
13:        else if  $y_{pred}(n) = \text{Ambulating}$  then
14:          if previous predicted bed/chair exit occurred more than 1.75 s ago then
15:             $\text{BedChairExitPred}(n) \leftarrow 1$ 
16:      else if  $y_{pred}(n-1) = \text{Lying}$  then
17:        if  $y_{pred}(n) = \text{Sit\_on\_chair}$  then
18:          if previous predicted bed/chair exit occurred more than 1.75 s ago then
19:             $\text{BedChairExitPred}(n) \leftarrow 1$ 
20:        else if  $y_{pred}(n) = \text{Sit\_on\_bed}$  then
21:          if previous predicted bed/chair exit occurred more than 1.75 s ago then
22:             $\text{BedChairExitPred}(n) \leftarrow 1$ 
23:        else if  $y_{pred}(n) = \text{Ambulating}$  then
24:          if previous predicted bed/chair exit occurred more than 1.75 s ago then
25:             $\text{BedChairExitPred}(n) \leftarrow 1$ 
26:      else if  $y_{pred}(n-1) = \text{Ambulating}$  then
27:        if  $y_{pred}(n) = \text{Sit\_on\_bed}$  then
28:          else if  $y_{pred}(n) = \text{Lying}$  then
29:            else if  $y_{pred}(n) = \text{Sit\_on\_chair}$  then

```

---
